# Supplementary material for: Resolvin-D2 targets myogenic cells and improves muscle regeneration in Duchenne muscular dystrophy
Source: PubMed Central journal article supplement (PMC8556273; doi:10.1038/s41467-021-26516-0), 2021-10-29
Supplement: 41467_2021_26516_MOESM1_ESM.pdf [file 41467_2021_26516_MOESM1_ESM.pdf]

**Supplementary material for**

**Resolvin-D2 targets myogenic cells and improves muscle  
regeneration in Duchenne Muscular Dystrophy**

Junio Dort, Zakaria Orfi, Paul Fabre, Thomas Molina, Talita C. Conte, Karine Greffard,  
Ornella Pellerito, Jean-François Bilodeau, and Nicolas A. Dumont

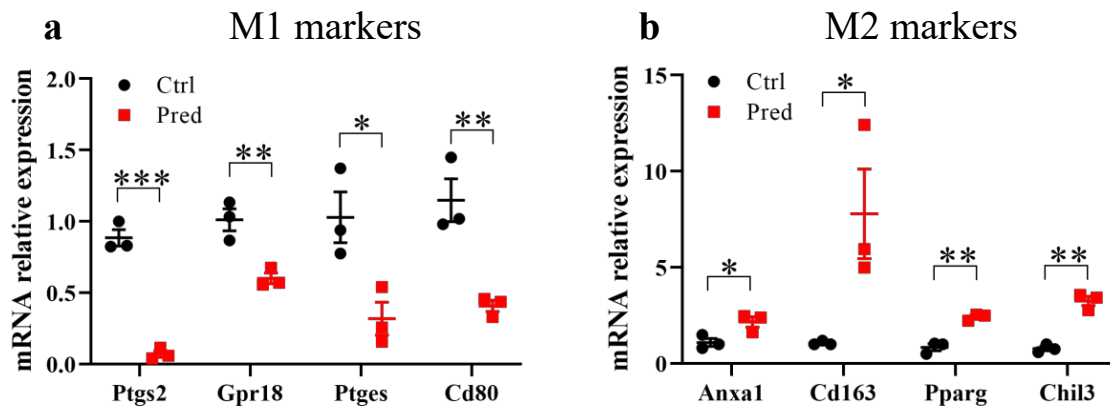

**Supplemental Figure 1. Impact of prednisone on the phenotype of M1-polarized macrophages.** Monocytes purified from bone marrow of *mdx* mice are differentiated into macrophages (M-CSF), polarized into M1 macrophages (IFN- $\gamma$  and LPS supplementation) and treated with prednisone (pred; 10  $\mu$ M) or vehicle (Ctrl) for 48 h. Gene expression of the (a) pro-inflammatory markers *Ptgs2* ( $p = 0.000193$ ), *Gpr18* ( $p = 0.008992$ ), *Ptges* ( $p = 0.028523$ ), and *Cd80* ( $p = 0.008745$ ), and (b) anti-inflammatory markers *Anxa1* ( $p = 0.034402$ ), *Cd163* ( $p = 0.044976$ ), *Pparg* ( $p = 0.001449$ ), and *Chil3* ( $p = 0.000758$ ) on M1-polarized macrophages treated with or without prednisone for 48 h. Data are presented as mean  $\pm$  SEM,  $n = 3$  biologically independent samples performed in technical duplicates and analyzed with two-tailed unpaired Student's t-test. All data were analyzed with a 95% confidence interval. \* $p < 0.05$ , \*\* $p < 0.01$ , \*\*\* $p < 0.001$ .

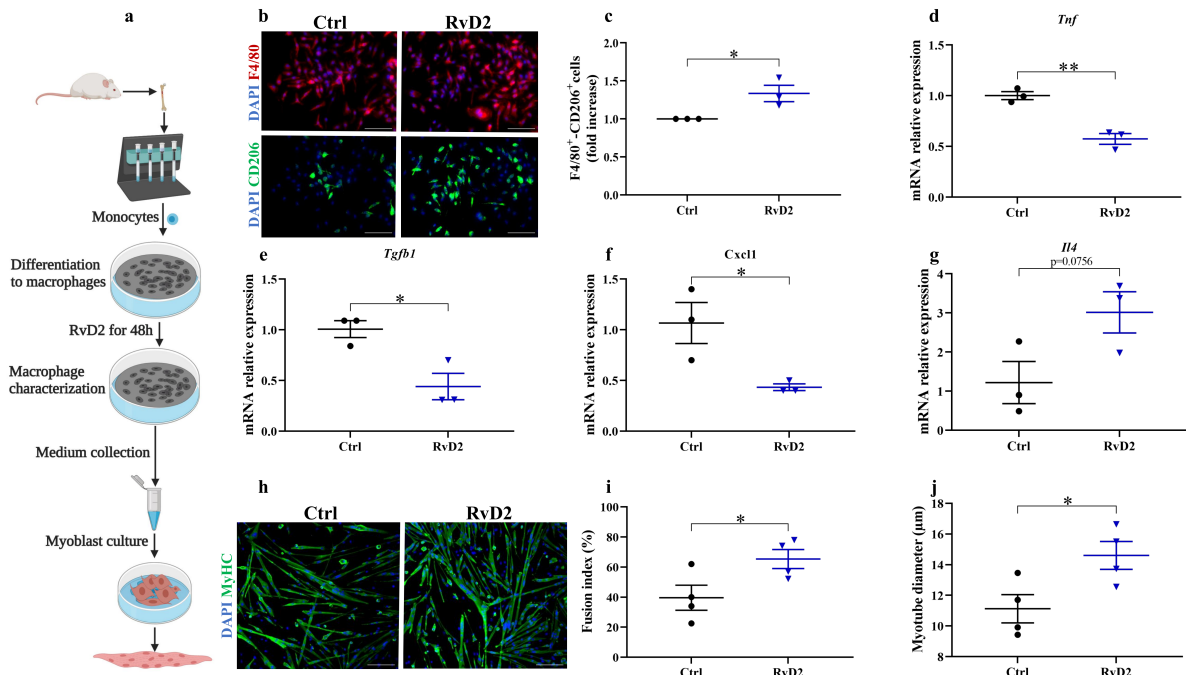

**Supplemental Figure 2. Resolvin-D2 promotes the anti-inflammatory phenotype of unpolarized macrophages and their release of pro-myogenic factors.** **a** Graphical overview of the myoblast:macrophage-conditioned medium co-culture experiments (created with BioRender.com). **b** Representative images of immunofluorescence performed on cultured macrophages for F4/80 (pan-macrophage marker; red), CD206 (anti-inflammatory macrophage marker; green), and DAPI (blue) Scale bars = 50  $\mu$ m. **c** Percentage of anti-inflammatory macrophages ( $F4/80^+CD206^+$  / total  $F4/80^+$ ) following 48 h treatment with or without Resolvin-D2 (RvD2, 200 nM) (p = 0.0360). **d-g** qPCR analyses performed on macrophages treated with or without RvD2 for 48 h, to determine their expression of **(d)** Tumour Necrosis Factor alpha (*Tnf*) (p = 0.0030), **(e)** Transforming Growth Factor beta (*Tgfb1*) (p = 0.0214), **(f)** Chemokine (C-X-C motif) ligand 1 (*Cxcl1*; IL-8 homolog) (p = 0.0369), and **(g)** Interleukin 4 (*Il4*) (p = 0.0756). **h** Representative images of primary myoblasts differentiated into myotubes for 4 days with the macrophage-conditioned medium and stained for myosin heavy chain (MyHC, green) and DAPI (blue) Scale bars = 75  $\mu$ m. **i** Quantification of the fusion index (proportion of nuclei into multinucleated myotubes / total nuclei) (p=0.0486) and **(j)** myotube diameter (p = 0.0359). Data are presented as mean  $\pm$  SEM, n = 3 (panels **c-g**) or n = 4 (panels **i,j**) biologically independent samples performed in technical duplicates and analyzed with the two-tailed unpaired Student's t-test. All data were analyzed with a 95% confidence interval. \*p < 0.05, \*\*p < 0.01.

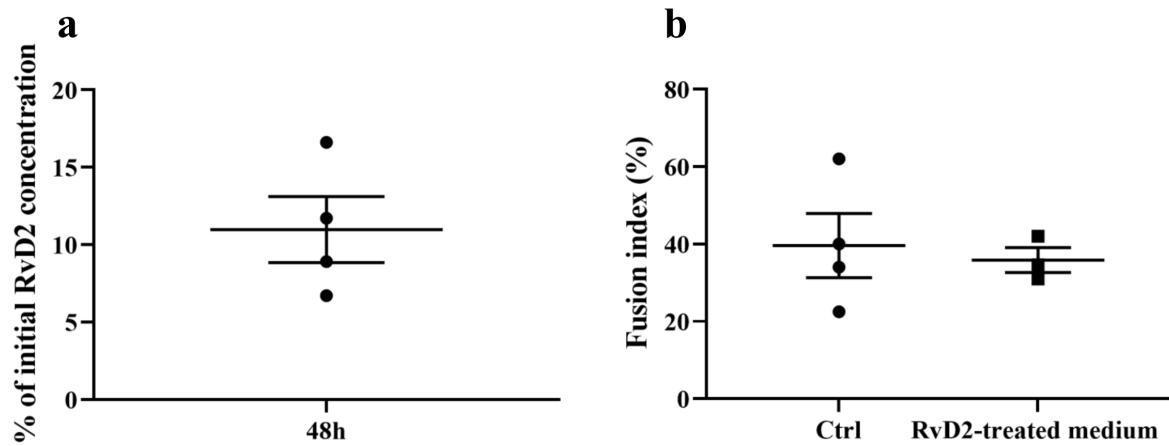

**Supplemental Figure 3. Myogenic effects of macrophage-conditioned medium are not mediated by remaining Resolvin-D2 in the medium.** **a** Concentration of Resolvin-D2 (RvD2) was assessed by ELISA in the culture medium 48 h after the supplementation of RvD2. The final concentration was expressed as the percentage of the initial concentration (200 nM). **b** To determine if the low remaining level of RvD2 in the medium after 48 h of treatment affects myogenesis, we added RvD2 in the medium in a macrophage-free well for 48 h. The medium was added to differentiating myoblasts. Data showed no difference compared to control, indicating that the myogenic effect of the macrophage-conditioned media is driven by paracrine factors secreted by macrophages upon RvD2 treatment and not by remaining RvD2 in the medium. Data are presented as mean  $\pm$  SEM,  $n = 4$  (except  $n = 3$  for RvD2-treated medium group in panel **b**) biologically independent samples performed in technical duplicates. Data were analyzed with two-tailed unpaired Student's t-test with a 95% confidence interval.

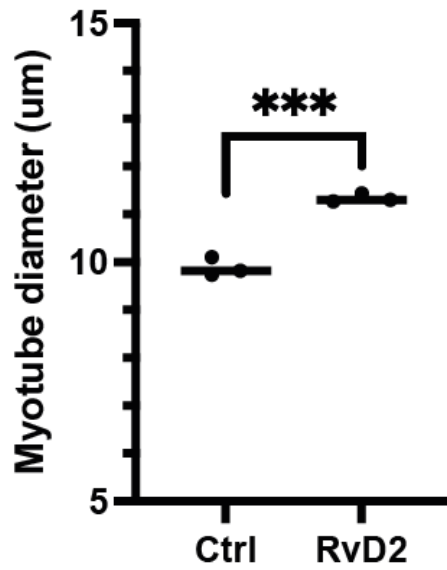

**Supplemental Figure 4. Effect of RvD2 on myotubes.** Myotubes were differentiated for 2 days. Thereafter, Resolvin-D2 (RvD2, 200 nM) or vehicle (Ctrl) was added in the differentiating medium for an additional 2 days, and myotube diameter was measured ( $p = 0.000278$ ). Data are presented as mean  $\pm$  SEM;  $n=3$  biologically independent samples performed in technical duplicates and analyzed using two-tailed unpaired Student's t-test. All data were analyzed with a 95% confidence interval. \*\*\* $p < 0.001$ , compared to vehicle.

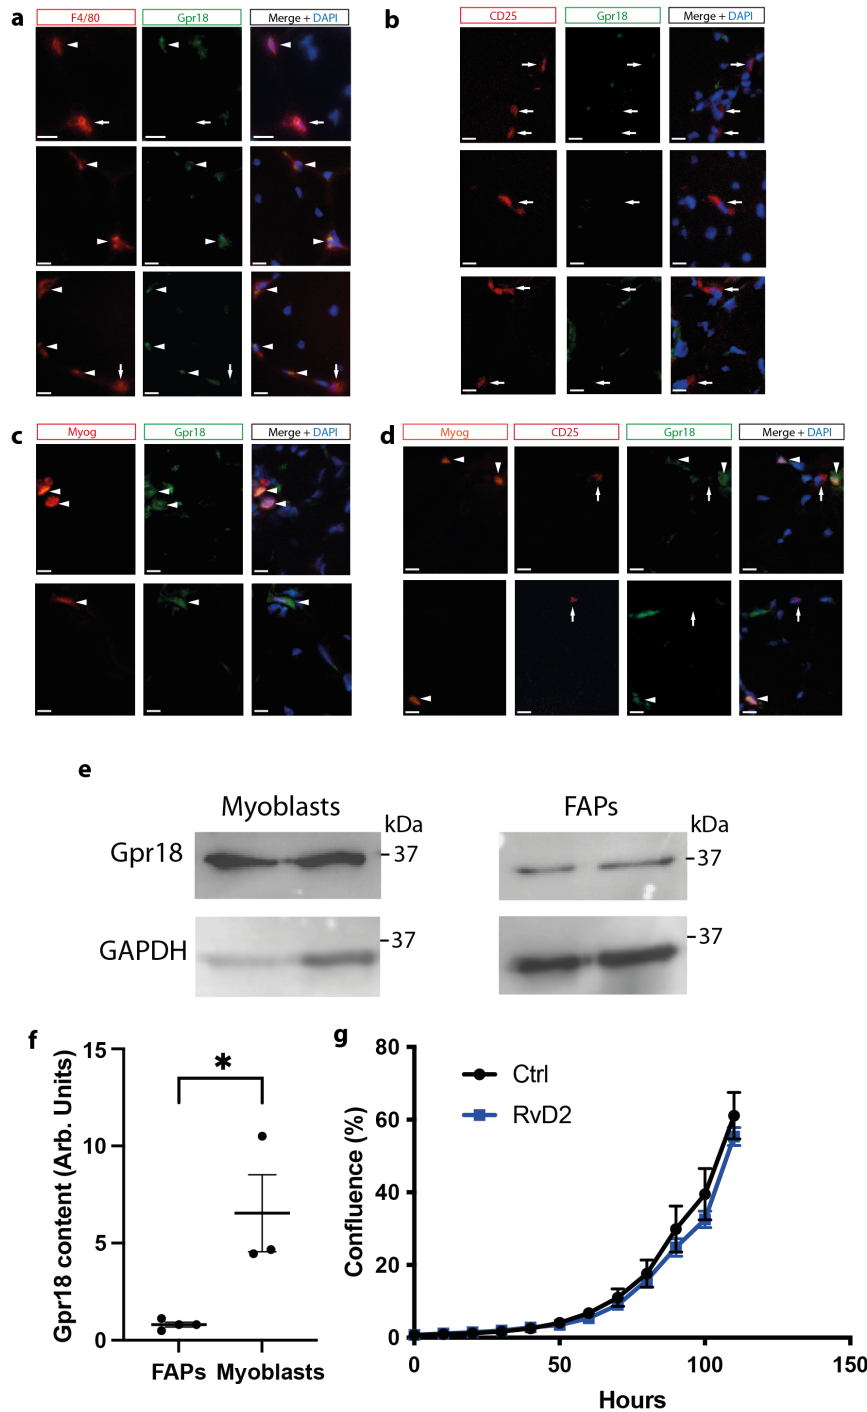

**Supplemental Figure 5. Gpr18 expression in different cell types in skeletal muscle.** Co-immunofluorescence of Gpr18 (RvD2 receptor) and markers for different cell types was performed on *tibialis anterior* (TA) muscles of *mdx* mice. **a** Representative pictures of F4/80 (macrophage marker; red), Gpr18 (green), and DAPI (blue). Scale bars = 10  $\mu$ m. Arrowheads show double positive cells (F4/80<sup>+</sup> Gpr18<sup>+</sup>; M1 macrophages) and arrows identify F4/80<sup>+</sup> Gpr18<sup>-</sup> cells (M2 macrophages). **b** Representative pictures of CD25 (Treg marker; red), Gpr18 (green), and DAPI (blue). Scale bars = 10  $\mu$ m. Virtually all CD25 cells are negative for Gpr18

as identified by white arrows. **c** Representative pictures of Myogenin (Myog, differentiated myoblast marker; red), Gpr18 (green), and DAPI (blue). Scale bars = 10  $\mu\text{m}$ . Arrowheads show double positive cells (Myog<sup>+</sup> Gpr18<sup>+</sup>). **d** Representative pictures of Myog (orange), CD25 (red), Gpr18 (green), and DAPI, showing that Myog<sup>+</sup> cells express Gpr18 (arrowheads) but not CD25<sup>+</sup> cells (arrows). Scale bars = 10  $\mu\text{m}$ . **e,f** Representative Western blots and quantification of the expression of Gpr18 (Gpr18/GAPDH) on proliferative myoblasts and FAPs isolated from *mdx* mice and cultured *in vitro* (p=0.0183). The samples derive from the same experiment and the gels/blots were processed in parallel. **g** Growth curves of FAPs treated with RvD2 (200 nM) or vehicle. **f,g** Data are presented as mean  $\pm$  SEM; n = 3 (except for FAPs in panel **f**, n = 4) biologically independent samples performed in technical duplicates and analyzed with the two-tailed unpaired Student's t-test. All data were analyzed with a 95% confidence interval. \*p < 0.05.

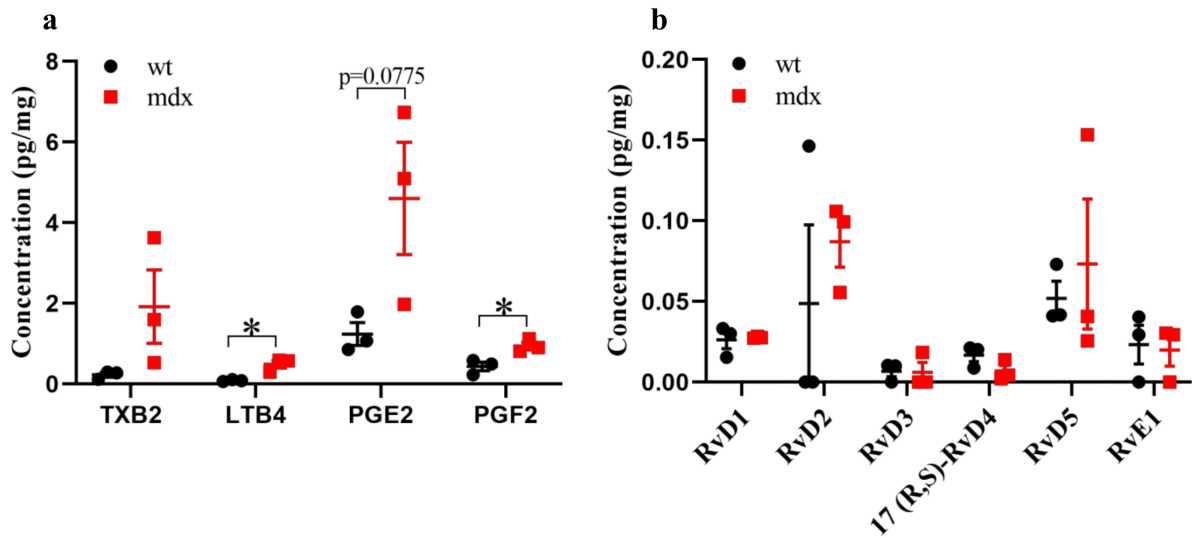

**Supplemental Figure 6. Expression of bioactive lipids in dystrophic muscles.** Mass spectrometry (LC-MS/MS) analysis of pro-inflammatory and pro-resolving bioactive lipids levels (pg/mg of muscle) in the gastrocnemius muscle of *mdx* and wild-type (wt) mice. **a** Pro-inflammatory mediators: TXB<sub>2</sub> (thromboxane-B<sub>2</sub>), LTB<sub>4</sub> (Leukotriene-B<sub>4</sub>, p = 0.014304), PGE<sub>2</sub> (Prostaglandin-E<sub>2</sub>, p = 0.077514), PGF<sub>2α</sub> (Prostaglandin-F<sub>2α</sub>, p = 0.022919). **b** Pro-resolving mediators: Resolvin-D1 (RvD1), RvD2, RvD3, 17(*R,S*)-RvD4, RvD5, Resolvin-E1 (RvE1). Data are presented as mean ± SEM; n = 3 biologically independent samples performed in technical duplicates and analyzed with the two-tailed unpaired Student's t-test. All data were analyzed with a 95% confidence interval. \*p < 0.05 compared to wild-type.



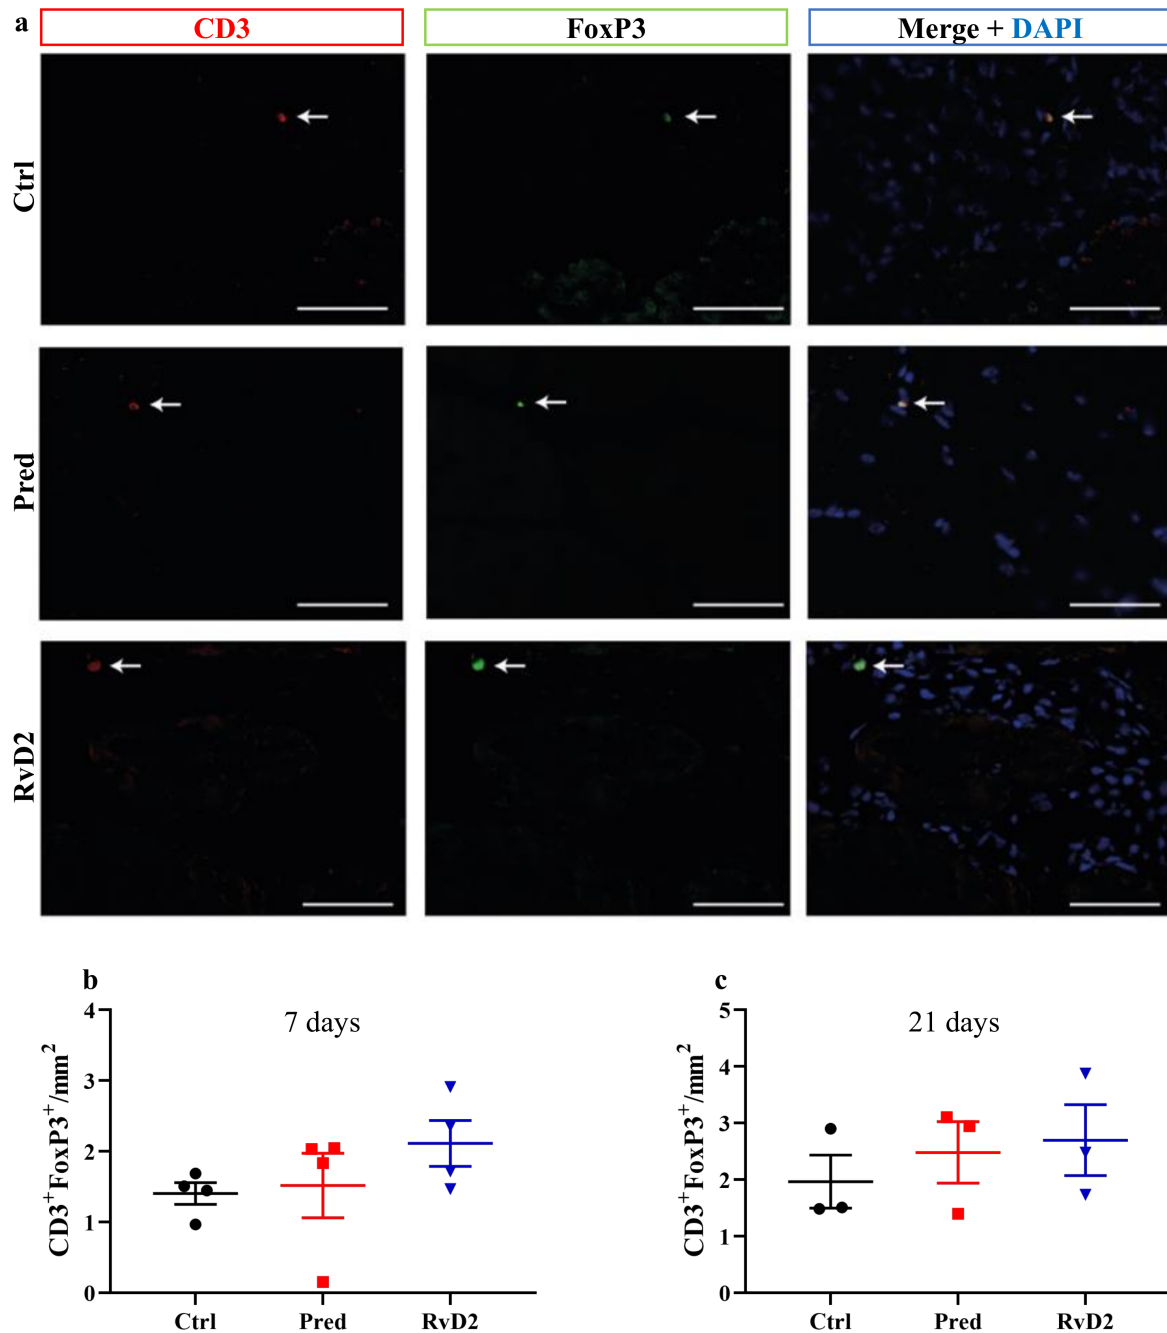

**Supplemental Figure 7. Resolvin-D2 does not affect the accumulation of Tregs.** **a** Representative images of *tibialis anterior* (TA) of *mdx* mice treated with daily i.p. injection of prednisone (pred), RvD2, or vehicle. Scale bars = 50  $\mu$ m. Co-immunofluorescence of CD3 (lymphocyte marker, red), FoxP3 (Treg marker, green), and DAPI (blue). **b,c** Quantification of Treg density (CD3<sup>+</sup>FoxP3<sup>+</sup>) after **(b)** 7 days, and **(c)** 21 days of treatment. Data are presented as mean  $\pm$  SEM; n = 3 (panel c) or n = 4 (panel b) mice per group. Data were analyzed using one-way ANOVA uncorrected Fisher's LSD test. All data were analyzed with a 95% confidence interval.

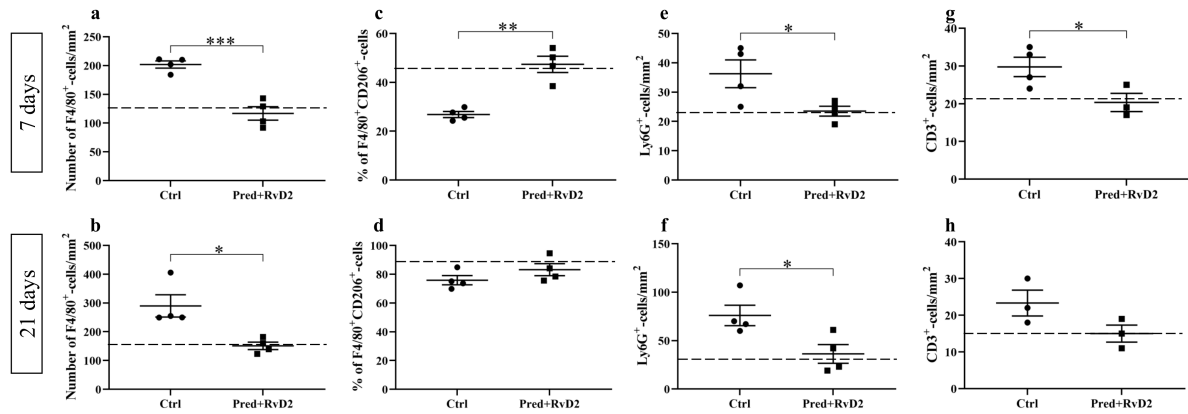

**Supplemental Figure 8. Combination of Resolvin-D2 and prednisone does not induce a cumulative anti-inflammatory effect. a-h** Daily *ip* injection of both Resolvin-D2 (RvD2, 5 ug/kg/day) and prednisone (pred, 2 mg/kg/day) compared to vehicle after 7 days (**a,c,e,g**) and 21 days of treatment (**b,d,f,h**). Dashed lines indicate the value of RvD2 treatment alone (Fig. 4). **a,b** Quantification of total macrophages (F4/80, pan-macrophage marker) and **c,d** percentage of anti-inflammatory macrophages (F4/80<sup>+</sup>CD206<sup>+</sup> / total F4/80<sup>+</sup>) in the *tibialis anterior* (TA) muscle of *mdx* mice after 7 days (total macrophages,  $p = 0.0007$ ; anti-inflammatory macrophages,  $p = 0.0012$ ) and 21 days (total macrophages,  $p = 0.0143$ ). **e,f** Density of neutrophils (Ly6G<sup>+</sup> cells) in TA muscles following 7 days ( $p = 0.0439$ ) and 21 days ( $p=0.0320$ ). **g,h** Density of T cells (CD3<sup>+</sup>) in TA muscles following 7 days ( $p = 0.0489$ ) and 21 days. Data are presented as mean  $\pm$  SEM,  $n = 4$  (except  $n = 3$  for panel **h**, and Pred+RvD2 group in panel **g**) mice per group/time-point. Experiments were performed in technical duplicates and analyzed with the two-tailed unpaired Student's t-test. All data were analyzed with a 95% confidence interval. \* $p < 0.05$ , \*\* $p < 0.01$ , \*\*\* $p < 0.001$ .

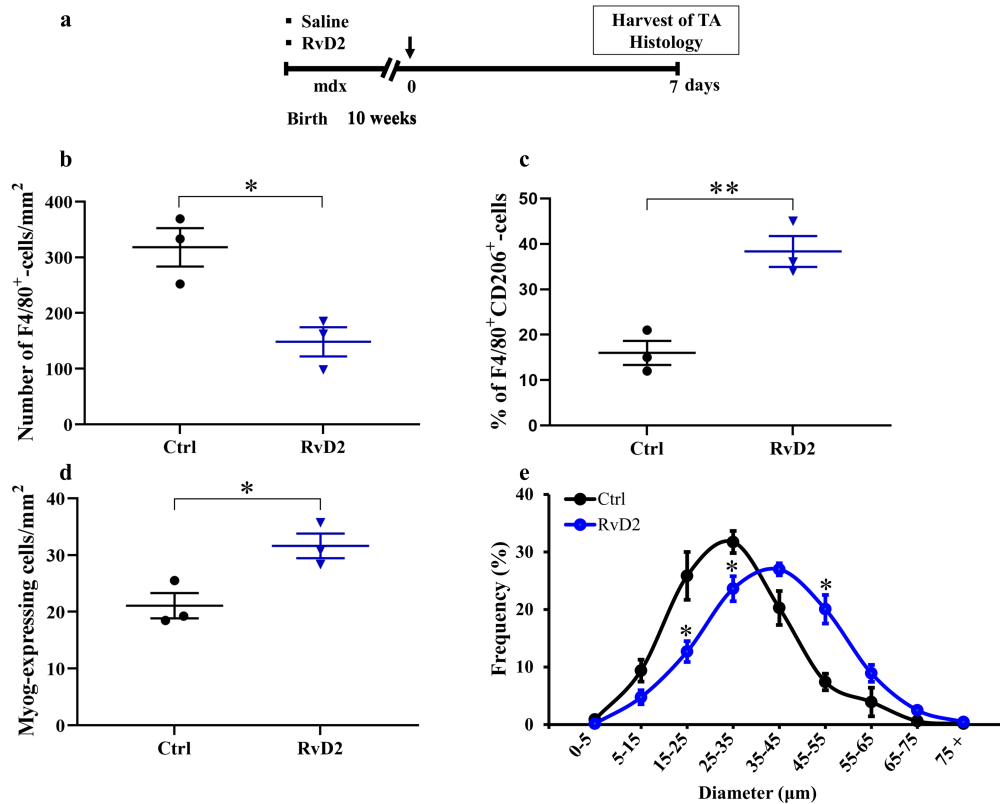

**Supplemental Figure 9. Intramuscular administration of Resolvin-D2 dampens inflammation and enhances muscle regeneration in *mdx* mice.** **a** Schematic of the experimental procedure characterized by a single intramuscular injection of Resolvin-D2 (RvD2, 5 μg/kg) or saline (Ctrl) within the *Tibialis anterior* (TA) of *mdx* mice, followed by histological measurements 7 days later. **b-e** Quantification of total macrophage density (F4/80, pan-macrophage marker;  $p = 0.0173$ )(**b**), percentage of anti-inflammatory macrophages (F4/80<sup>+</sup>CD206<sup>+</sup>/ total F4/80<sup>+</sup>;  $p = 0.0065$ ) (**c**), density of differentiated myoblasts (Myog<sup>+</sup>;  $p = 0.0359$ ) (**d**), and muscle fiber diameter of treated mice (RvD2 vs Ctrl: 15-25 μm,  $p = 0.0443$ ; 25-35 μm,  $p = 0.0493$ ; 45-55 μm,  $p = 0.0116$ ) (**e**). Data are presented as mean ± SEM,  $n = 3$  mice per group. Experiments were performed in technical duplicates and analyzed with the two-tailed unpaired Student's t-test. All data were analyzed with a 95% confidence interval. \* $p < 0.05$ , \*\* $p < 0.01$ .

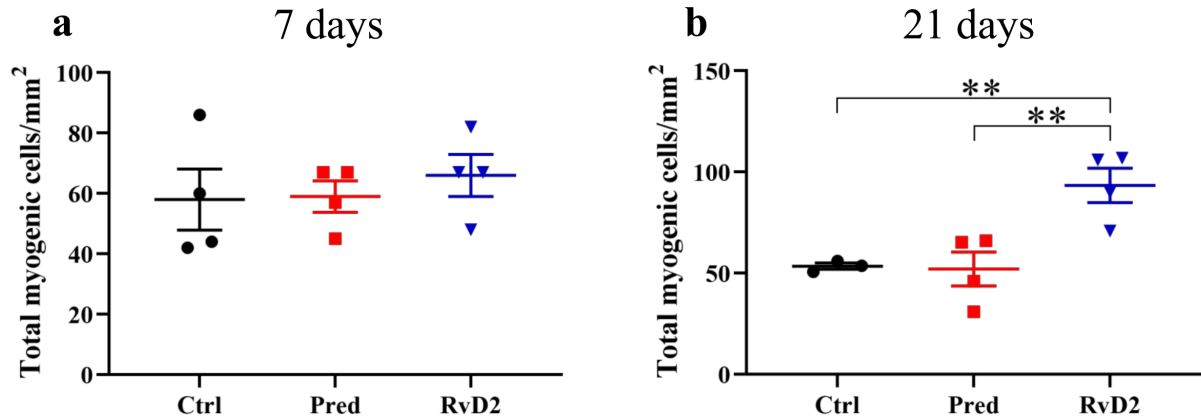

**Supplemental Figure 10. Resolvin-D2 increases total myogenic cell number.** **a,b** Total number of myogenic cells (Pax7<sup>+</sup> and Myog<sup>+</sup> cells) was counted on *tibialis anterior* (TA) muscle sections of *mdx* mice treated with daily injection of prednisone (Pred, 2 mg/kg/day), Resolvin-D2 (RvD2, 5 ug/kg/day), or vehicle (Ctrl) for **(a)** 7 days, or **(b)** 21 days (21d: Ctrl vs. Pred, p = 0.9026; Ctrl vs. RvD2, p = 0.0074; Pred vs. RvD2, p = 0.0040). Data are presented as mean ± SEM, n = 4 (except n = 3 for Ctrl group in panel **b**) mice per group/time-point. Experiments were performed in technical duplicates and analyzed using one-way ANOVA uncorrected Fisher's LSD test. All data were analyzed with a 95% confidence interval. \*\*p < 0.01.

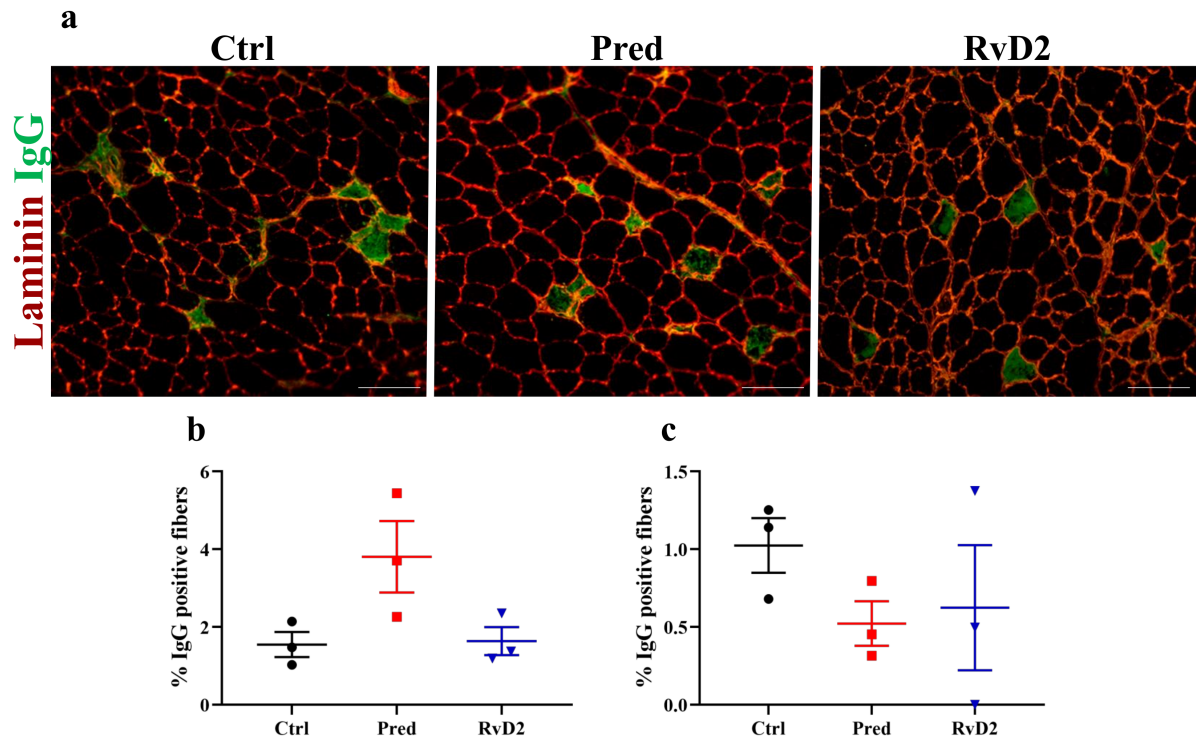

**Supplemental Figure 11. Resolvin-D2 has no impact on muscle fiber necrosis in *mdx* mice.**

**a** Representative images of immunostaining of laminin (red) and IgG (green) on tibialis anterior (TA) of *mdx* mice treated with daily injection with either Resolvin-D2 (RvD2, 5 ug/kg/day), prednisone (pred, 2 mg/kg/day) or vehicle (Ctrl). Scale bars = 100  $\mu$ m. Percentage of IgG positive necrotic fibers in TA muscle sections of *mdx* mice following **(b)** 7 days, and **(c)** 21 days of treatment. Data are presented as mean  $\pm$  SEM; n = 3 mice per group/time-point. Data were analyzed using one-way ANOVA uncorrected Fisher's LSD test. All data were analyzed with a 95% confidence interval.

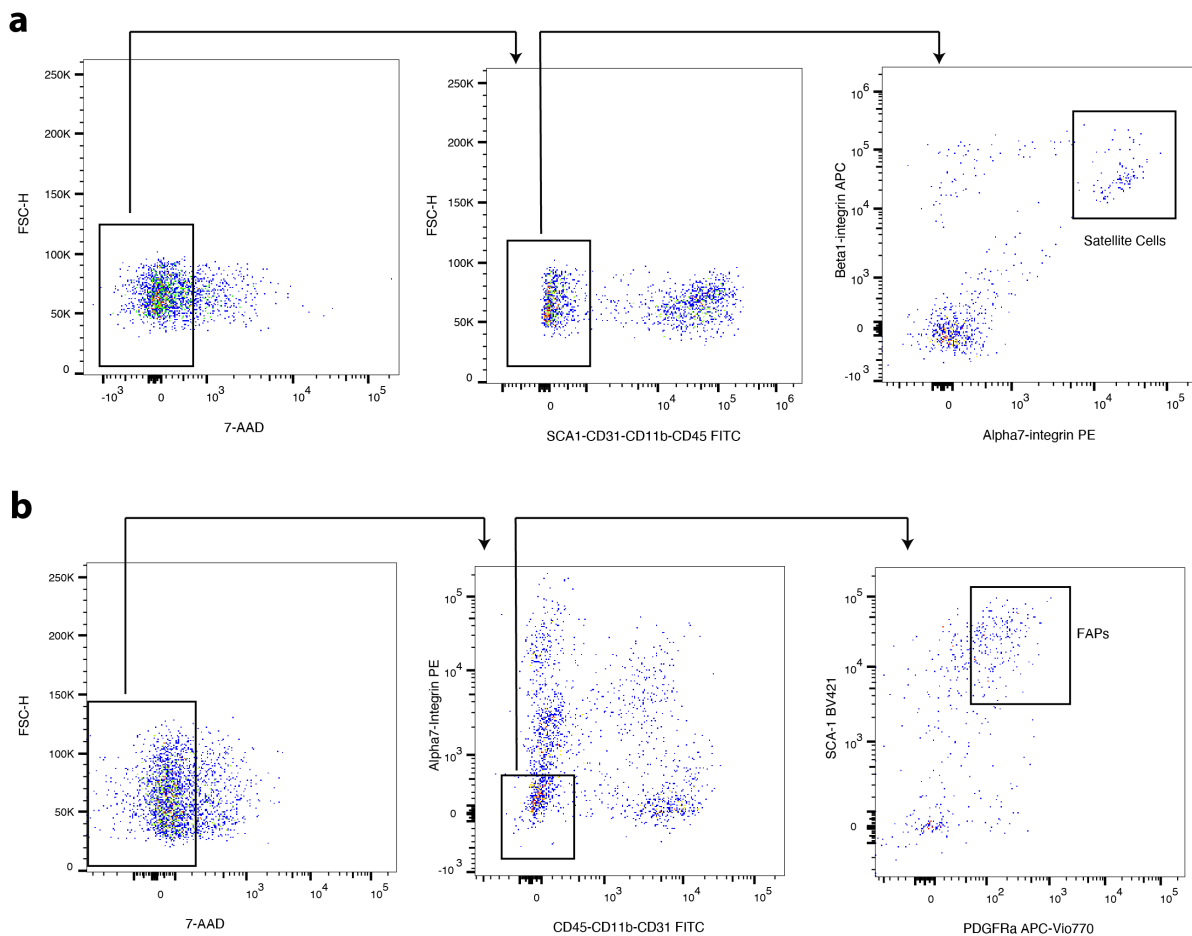

**Supplemental figure 12: FACS gating strategies.** **a** Strategies for cell sorting satellite cells from mouse hindlimb skeletal muscles (cells used in Fig 1-3 and Suppl Fig. 2-6). Cells were sorted based on forward scatter (FSC-H), cell viability (7-AAD), negative selection with FITC-conjugated antibodies for anti-Sca-1, anti-CD45, anti-CD31, anti-CD11b, and positive selection for APC-conjugated anti-Itgb1 and PE-conjugated anti-Itga7. **b** Strategies for cell sorting fibroadipogenic progenitors (FAPs) from mouse hindlimb skeletal muscles (cells used in Suppl Fig. 5). Cells were sorted using a gating strategy based on forward scatter (FSC-H) and cell viability (7-AAD), followed by negative selection with FITC-conjugated antibodies for anti-CD45, anti-CD31, anti-CD11b, and PE-conjugated anti-Itga7, and positive selection for APC-Vio 770 anti-CD140a (pdgfra) and BV421 anti-Sca-1.

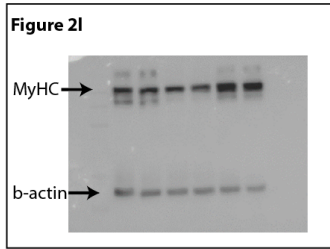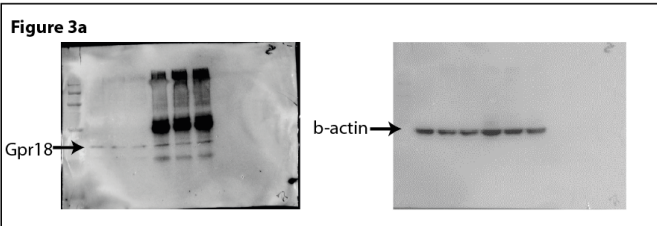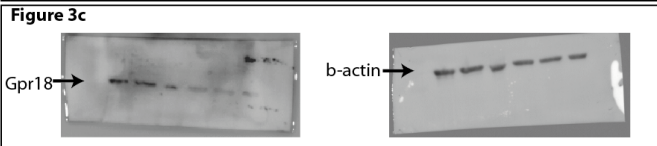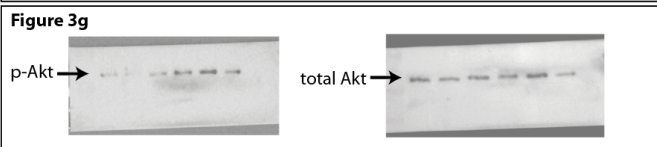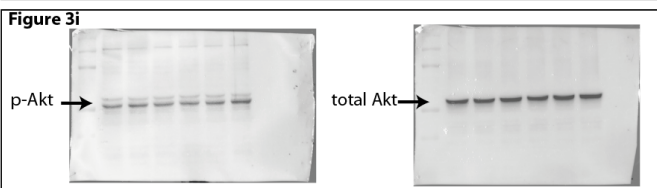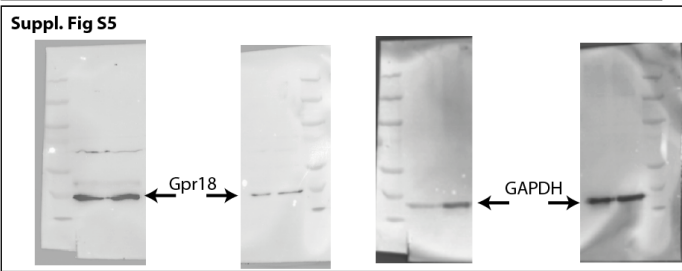

**Supplemental Figure 13.** Uncropped gels of Western blot shown in main and supplemental figures.

| <b>Genes</b> | <b>Sequences</b>                                                                   |
|--------------|------------------------------------------------------------------------------------|
| <i>Tnf</i>   | forward: 5'-AGCCGATGGGTTGTACCTTG-3'<br>reverse: 5'-CTCCAAAGTAGACCTGCCCG-3'         |
| <i>Il-4</i>  | forward: 5'-CAGCAACGAAGAACCACAG-3'<br>reverse: 5'-AAGCCCGAAAGAGTCTCTGC-3'          |
| <i>Cxcl1</i> | forward: 5'-TGGCTGGGATTCACCTCAAG-3'<br>reverse: 5'-AGTGTGGCTATGACTTCGGTT-3'        |
| <i>Tgfb1</i> | forward: 5'-ACCGCAACAACGCCATCTAT-3'<br>reverse: 5'-TGCCGTACAACCTCCAGTGAC-3'        |
| <i>Anxa1</i> | forward: 5'-GGTGACCGTTGTCAGGACTT-3'<br>reverse: 5'-CTGGTGGCACACTTCACGAT-3'         |
| <i>Cd163</i> | forward: 5'-GAGACACACGGAGCCATCAA-3'<br>reverse: 5'- TGGACAAACCTTTTACAACCAGG-3'     |
| <i>Pparg</i> | forward: 5'-GGTGAACCACTGATATTCAGGACA-3'<br>reverse: 5'-GTTCTACTTTGATCGCACTTTGGT-3' |
| <i>Chil3</i> | forward: 5'-GAAGCTCTCCAGAAGCAATCCTG-3'<br>reverse: 5'- TTCAGAAGAATTGCCAGACCTGT-3'  |
| <i>Gpr18</i> | forward: 5'-CTGAAGCCCAAGGTCAAGGA-3'<br>reverse: 5'-TTGTAGCATCAGGACGGCAA-3'         |
| <i>Ptgs2</i> | forward: 5'-CATCCCCTTCCTGCGAAGTT-3'<br>reverse: 5'-CATGGGAGTTGGGCAGTCAT-3'         |
| <i>Ptges</i> | forward: 5'-CCTGGAAGGGAACCTTTGGCT-3'<br>reverse: 5'-TCAGGACTCTGGAGGGACAC-3'        |
| <i>Cd80</i>  | forward: 5'-TGCTCTCAGAACCAAGCCAC-3'<br>reverse: 5'-ATGCTGCAGCTTACTTCCCC-3'         |
| <i>Gapdh</i> | forward: 5'-CCCAGAAGACTGTGGATGG-3'<br>reverse: 5'- ACACATTGGGGGTAGGAACA -3'        |

**Supplemental table 1. List of primers used for qPCR experiments.**



| <b>Compounds</b>      | <b>Standard (m/z)</b> | <b>Internal standards (m/z)</b> |
|-----------------------|-----------------------|---------------------------------|
| <b>Leukotriene</b>    |                       |                                 |
| LTB <sub>4</sub>      | 335.3 → 195.1         | 339.3 → 197.1                   |
| <b>Resolvins</b>      |                       |                                 |
| RvD1                  | 375.2 → 141.0         | 380.3 → 141.0                   |
| RvD2                  | 375.3 → 175.1         | 380.4 → 175.0                   |
| RvD3                  | 375.3 → 147.2         |                                 |
| 17( <i>R,S</i> )-RVD4 | 375.2 → 101.0         |                                 |
| RvD5                  | 359.3 → 199.0         |                                 |
| RvE1                  | 349.2 → 195.0         |                                 |
| <b>Prostaglandins</b> |                       |                                 |
| TxB <sub>2</sub>      | 369.3 → 195.0         | 373.3 → 199.1                   |
| PGF <sub>2α</sub>     | 353.3 → 193.0         | 357.3 → 197.2                   |
| PGE <sub>2</sub>      | 351.2 → 189.0         | 360.2 → 189.0                   |

**Supplemental table 2. Selected reaction monitoring transitions for tandem mass spectrometry.** TXB<sub>2</sub> (thromboxane-B<sub>2</sub>), LTB<sub>4</sub> (Leukotriene-B<sub>4</sub>), PGE<sub>2</sub> (Prostaglandin-E<sub>2</sub>), PGF<sub>2α</sub> (Prostaglandin-F<sub>2α</sub>), Resolvin-D1 (RvD1), RvD2, RvD3, 17(*R,S*)-RvD4, RvD5, Resolvin-E1 (RvE1).
